# Supplementary material for: Reference-Free Validation of Short Read Data
Source: PLOS journal article supplement (doi:10.1371/journal.pone.0012681), 2010-09-22
Supplement: S1 (10.1371/journal.pone.0012681.s001) [file journal.pone.0012681.s001]

**Table S1:** We analysed the following data sets of short Illumina and Roche 454 reads:

| Identifier | Experiment name                | Accession Number                           | Organism                | Instrument model                           | Read length | Number of reads |
|------------|--------------------------------|--------------------------------------------|-------------------------|--------------------------------------------|-------------|-----------------|
| D1         | SRX005986 (NCBI SRA)           | SRR018090                                  | Drosophila melanogaster | Illumina Genome Analyzer II                | 45          | 8505994         |
| D2         | NA06985 (1000 Genomes Project) | ERR001014, ERR001015, ERR002406, ERR002407 | Homo sapiens            | Solexa 1G Genome Analyzer                  | 35-37       | 22414082        |
| D3         | NA11829 (1000 Genomes Project) | SRR003488                                  | Homo sapiens            | Illumina Genome Analyzer II<br>Solexa-5374 | 36          | 11442213        |
| D4,D4*     | NA12155 (1000 Genomes Project) | SRR00312[1-6]                              | Homo sapiens            | Illumina Genome Analyzer II<br>Solexa-6388 | 51          | 87872470        |
| D5         | NA10847 (1000 Genomes Project) | ERR000553, ERR000554                       | Homo sapiens            | Illumina Genome Analyzer II                | 51          | 51116704        |
| D6         | NA12272 (1000 Genomes Project) | SRR015432, SRR015424                       | Homo sapiens            | Illumina Genome Analyzer II                | 51          | 23739801        |
| D7         | SRX017210 (NCBI SRA)           | SRR036930                                  | C. botulinum            | Roche LS454                                | 35-402      | 522206          |

**Data preparation:**

All data sets have been filtered for poly A reads that occur in Illumina read sets.

Although poly A regions may occur in the sequenced genome, these reads are likely to be misread due to reflections at the periphery of the flow cells.

Data sets *D1* and *D4* have been mapped to their reference genome to guarantee valid reads without any adaptors or primers left in the data. The reads have been mapped with *SOAP2* against their references *Release 5* for *Drosophila* and *hg19* for human respectively (allowing up to two mismatches and taking only uniquely mapping reads):

- For *D1* 6457223 reads mapped uniquely to the reference (75.9%).
- For *D4* 66521869 reads mapped uniquely to the reference (75.7%).

Furthermore, we applied quality filtering to the *D4\** read set:

- Only reads with a phred quality score over 10 (corresponding to a confidence of over 90%) in every base have been taken into account. Note that the mapping was applied to *D4\** as well. 27235724 passed the filtering stages (31%).
